# Supplementary material for: Enhanced copy number variants detection from whole-exome sequencing data using EXCAVATOR2
Source: PubMed Central journal article supplement — Nucleic Acids Res. 2016 Aug 9;44(20):e154. doi: 10.1093/nar/gkw695 (PMC5175347; doi:10.1093/nar/gkw695), 2016-08-09

# Supplemental Materials to "Enhanced copy number variants detection from whole-exome sequencing data using EXCAVATOR2"

Romina D'Aurizio<sup>1</sup>, Tommaso Pippucci<sup>2</sup>, Lorenzo Tattini<sup>3</sup>, Betti Giusti<sup>3</sup>, Marco Pellegrini<sup>1</sup>, Alberto Magi<sup>3</sup>

<sup>1</sup>LISM, Institute of Informatics and Telematics and Institute of Clinical Physiology, National Research Council, Pisa <sup>2</sup>Medical Genetics Unit, Sant'Orsola Malpighi Polyclinic, Bologna <sup>3</sup>Department of Computer Science, University of Pisa, Pisa and <sup>4</sup>Department of Experimental and Clinical Medicine, University of Florence, Florence

August 8, 2016

## Supplemental Methods and Data

Here we extended the RC approach (Magi *et al.*, 2010) to all the genome for the identification of CNVs from WES data. We proved, indeed, that around 30% on average of reads produced by WES experiments align outside the targeted regions. As for In-target regions, also for Off-target if the sequencing process is uniform then the number of reads mapping to each genomic region is expected to be proportional to the number of times the region appears in the DNA sample. Following this assumption, the copy number of any genomic region can be estimated by counting the number of reads aligned to non-overlapping and contiguous genomic windows of predefined size  $L$ . Even though the sequencing processes producing In- and Off-target reads are independent we can apply the RC approach also to Off-target regions. To this end we expanded the Exon Mean Read Count (EMRC) that we introduced in 2013 (Magi *et al.*, 2013) defining the Window Mean Read Count (WMRC) which account for both In-target exons and Off-target windows of fixed size.

## 1 GC-content and Mappability normalisation of WMRC

In our previous work (Magi *et al.*, 2013) we demonstrated that EMRC data are affected by three sources of biases: the total GC content, the genomic mappability and the exon size which we removed using the median normalisation approach introduced by Yoon in 2009 (Yoon *et al.*, 2009) for GC content and extended by us for mappability and exon size biases. Here we proved that WMRC data in Off-target windows are affected by similar GC content and mappability biases that we corrected according to the following formula:

$$\overline{WMRC}_w = WMRC_w \frac{m}{m_X} \quad (1)$$

where  $WMRC_w$  is the number of reads aligned to a genomic region of length  $W$ .  $W$  varies according to the size of each targeted exon or, in case of Off-target, it corresponds to the selected fixed size of non-overlapping windows in which the intergenic chromosome is divided;  $m_X$  is the median WMRC of all the windows that have the same  $X$  value (where  $X$  stands for GC content, mappability score and, only for In-target, exon size) as the  $i$ -th window, and  $m$  is the overall median of all the windows.

## 2 Dataset description

### 2.1 WES survey dataset analysis

The WES survey dataset is made of 30 different sequencing experiments performed using three enrichment kits (Agilent SureSelect Human All Exon 50Mb, NimbleGen SeqCap EZ Exome v2.0 44Mb, Illumina TruSeq Exome Enrichment 62Mb). The raw sequences of ERR039174, SRR309292, SRR309293 and SRR309291 were downloaded from NCBI Sequence Read Archive while 26 WES were sequenced by our group using Illumina HiSeq2000 system and producing 100PE reads libraries. Details are summarised in Supp. Table 1. All reads were aligned to the human reference genome (hg19) using BWA short read aligner 0.7.5-r404 (Li and Durbin, 2010) and duplicates were filtered out with MarkDuplicates of Picard 1.92 package (<http://picard.sourceforge.net>). Read pairs with identical external coordinates could have been introduced by the PCR amplification step. MarkDuplicates retains only the pair with the highest mapping quality. Subsequently IndelRealigner module of GATK v2.5-2 (DePristo *et al.*, 2011) was used for local realignment around Indels. Reads with mapping quality MQ 10 were removed by using the SAMtools package 0.1.19-44428cd (Li *et al.*, 2009). Finally, we download the exact genomic coordinates of each target kit (Agilent SureSelect Human All Exon 50Mb, NimbleGen SeqCap EZ Exome v2.0 44Mb, Illumina TruSeq Exome Enrichment 62Mb) from manufacturer websites and we counted the number of reads mapping in In-Target, Flanking regions of 200bp or Off-Target by means of SAMtools flagstat.

### 2.2 1000 Genomes Project dataset

The accuracy of our method for predicting the absolute number of DNA copies of genomic regions from exome data in a population study was evaluated by analysing 8 WES from healthy individuals sequenced by the 1000 Genomes Project (1000 Genomes Project Consortium *et al.*, 2010) (see Supp. Table 2 for details). Same individuals had been previously genotyped by McCarroll (McCarroll *et al.*, 2008) and Conrad (Conrad *et al.*, 2010) using array-based technologies. The bam files were retrieved from the official 1KG ftp site(<ftp://ftp.1000genomes.ebi.ac.uk/vol1/ftp/data/>), and were processed, sorted and filtered (discarding MQ 10) with SAMtools. Last, PCR duplicates were removed using MarkDuplicates of Picard 1.92 package (<http://picard.sourceforge.net>). We calculated the normalised WMRC for In-target and Off-target as previously described, then the log<sub>2</sub>-ratio of normalised WMRC between each test and the control (NA10847) was analyzed by the SLM (Magi *et al.*, 2010) (with  $\omega = 0.1$ ,  $\eta = 10^{-5}$ ). The resulting values were compared to the log<sub>2</sub>-copy number ratio of regions inferred by McCarroll and Conrad studies. Correlation with McCarroll calls are shown in Figure 3 of the main test, instead the results from the comparison with Conrad are in Supp. Figure 3.

Moreover, we analysed further 45 samples sequenced by the 1KG Project. The WES bam files were downloaded from the ftp site(<ftp://ftp.1000genomes.ebi.ac.uk/vol1/ftp/data/>). The original bam file were then sorted and filtered as previously described from duplicates. This dataset consists of exomes that were sequenced in 4 different centres (BCM - Baylor College of Medicine; BI - Broad Institute; BGI - Beijing Genomics Institute; WUGC - Washington University Genome Center ) using different exome enrichment kits. The corresponding bed file of the designed targeted regions were retrieved from the resources listed at the 1KG website ( <http://www.1000genomes.org/category/pull-down/>). The bam file were processed as previous described for the small dataset of 8 sample. The log<sub>2</sub>-ratio of normalised WMRC was analysed using the SLM segmentation algorithm (Magi *et al.*, 2010) followed by the FastCallSeq algorithm (Benelli *et al.*, 2010) (setting cellularity parameter  $c = 1$ ). Same exome data was also analysed with XHMM (Fromer *et al.*, 2012), CoNIFER (Krumm *et al.*, 2012), CODEX (Jiang *et al.*, 2015) and CopywriteR Kuilman *et al.* (2015) and results were compared and evaluated using the collections of all genomic CNVs genotyped by HapMap and 1KG Project for the same 45 individuals. Precision and recall, as defined in the main text, were calculated and shown in Figure 4.

### 2.3 Urothelial bladder cancer samples

We tested our computational pipeline on a dataset including 14 bladder cancer tissues and 14 blood samples from same patients with different tumor stages and grades. Whole-exome sequencing data were downloaded from the SRA repository, study SRP029936. They are part of the study published by Balbas-Martinez and her colleagues in 2013 (Balbas-Martinez *et al.*, 2013). Agilent SureSelect Human All Exon

plus v3 50Mb or v4 51Mb were used for library preparation and enrichment (see Suppl. Table 4 for details). Sequencing was performed on HiSeq2000 producing 75bp paired-end reads. WES reads were aligned as described for the WES survey dataset (Sec. 2.1). Bed files of targeted regions were acquired directly from Agilent website. WES data was analysed with EXCAVATOR2 and CopywriteR (see next sections for details).

Same samples were also assayed using Illumina OmniExpress v1.0 SNP-array. For them, the log2ratio (red/green) values of single SNP for each sample were calculated. The ratios between each pair of tumour and control samples were then normalised and analysed using the SLM segmentation algorithm (Magi et al., 2010) (with  $\omega = 0.1$ ,  $\eta = 10^{-5}$ ). Finally each segment was classified by using the FastCall calling procedure (Benelli *et al.*, 2010), setting cellularity parameter  $c = 1$ .

Results by using 50K bp as size for the windows in off target regions were selected because the difference between In- and Off-Target SNR ratios were the lowest on average per sample. We compared the segmented signals from EXCAVATOR2 (HSLMResults\_\*.txt) and CopywriteR (from segment.RData) to segmented SLM results of SNP-arrays. madDiff function of CRAN matrixStat v0.14.2 package was employed for MAD value calculation.

### 3 Running parameters other tools

The dataset of 45 health individuals was analysed using XHMM v1.0, CONIFER v0.2.2, CODEX v0.99.6 and CopywriteR v1.99.4. We run XHMM with default parameters following authors' instructions in the tutorial (<http://atgu.mgh.harvard.edu/xhmm/tutorial.shtml>). Also for CONIFER we followed tutorial instructions (<http://conifer.sourceforge.net/tutorial.html>) setting the number of svd components removed to 2, based on the inflection point or the plateau of the scree plot generated. For CODEX, since, as suggested by the authors, it works better with similar experiments. We split the 45 WES dataset in 4 different subset according to sequencing library length (e.g. 76bp, 90bp,100bp and 101bp). Finally, we used CopywriteR with bin size = 50000bp and default parameters. Produced segmented profiles of each sample were extracted and transformed in copy number.

For the somatic dataset, CopywriteR was run with default parameters, leaving 20000bp of bin size.

## References

- 1000 Genomes Project Consortium, Abecasis, G. R., Altshuler, D., Auton, A., Brooks, L. D., Durbin, R. M., Gibbs, R. A., Hurles, M. E., and McVean, G. A. (2010). A map of human genome variation from population-scale sequencing. *Nature*, **467**(7319), 1061–73.
- Balbas-Martinez, C., Sagrera, A., Carrillo-de Santa-Pau, E., Earl, J., Marquez, M., Vazquez, M., Lapi, E., Castro-Giner, F., Beltran, S., Bayes, M., Carrato, A., Cigudosa, J. C., Dominguez, O., Gut, M., Herranz, J., Juanpere, N., Kogevinas, M., Langa, X., Lopez-Knowles, E., Lorente, J. A., Lloreta, J., Pisano, D. G., Richart, L., Rico, D., Salgado, R. N., Tardon, A., Chanock, S., Heath, S., Valencia, A., Losada, A., Gut, I., Malats, N., and Real, F. X. (2013). Recurrent inactivation of stag2 in bladder cancer is not associated with aneuploidy. *Nature Genet.*, **45**(12), 1464–U221.
- Benelli, M., Marseglia, G., Nannetti, G., Paravidino, R., Zara, F., Bricarelli, F. D., Torricelli, F., and Magi, A. (2010). A very fast and accurate method for calling aberrations in array-cgh data. *Biostatistics*, **11**(3), 515–8.
- Conrad, D. F., Pinto, D., Redon, R., Feuk, L., Gokcumen, O., Zhang, Y., Aerts, J., Andrews, T. D., Barnes, C., Campbell, P., Fitzgerald, T., Hu, M., Ihm, C. H., Kristiansson, K., Macarthur, D. G., Macdonald, J. R., Onyiah, I., Pang, A. W. C., Robson, S., Stirrups, K., Valsesia, A., Walter, K., Wei, J., Wellcome Trust Case Control Consortium, Tyler-Smith, C., Carter, N. P., Lee, C., Scherer, S. W., and Hurles, M. E. (2010). Origins and functional impact of copy number variation in the human genome. *Nature*, **464**(7289), 704–12.
- DePristo, M. A., Banks, E., Poplin, R., Garimella, K. V., Maguire, J. R., Hartl, C., Philippakis, A. A., del Angel, G., Rivas, M. A., Hanna, M., McKenna, A., Fennell, T. J., Kernytzky, A. M., Sivachenko, A. Y., Cibulskis, K., Gabriel, S. B., Altshuler, D., and Daly, M. J. (2011). A framework for variation discovery and genotyping using next-generation dna sequencing data. *Nat Genet*, **43**(5), 491–8.

- Fromer, M., Moran, J. L., Chambert, K., Banks, E., Bergen, S. E., Ruderfer, D. M., Handsaker, R. E., McCarroll, S. A., O'Donovan, M. C., Owen, M. J., Kirov, G., Sullivan, P. F., Hultman, C. M., Sklar, P., and Purcell, S. M. (2012). Discovery and statistical genotyping of copy-number variation from whole-exome sequencing depth. *Am J Hum Genet*, **91**(4), 597–607.
- Jiang, Y., Oldridge, D. A., Diskin, S. J., and Zhang, N. R. (2015). Codex: a normalization and copy number variation detection method for whole exome sequencing. *Nucleic Acids Res*, **43**(6), e39.
- Krumm, N., Sudmant, P. H., Ko, A., O'Roak, B. J., Malig, M., Coe, B. P., NHLBI Exome Sequencing Project, Quinlan, A. R., Nickerson, D. A., and Eichler, E. E. (2012). Copy number variation detection and genotyping from exome sequence data. *Genome Res*, **22**(8), 1525–32.
- Kuilman, T., Velds, A., Kemper, K., Ranzani, M., Bombardelli, L., Hoogstraat, M., Nevedomskaya, E., Xu, G., de Ruiter, J., Lolkema, M. P., Ylstra, B., Jonkers, J., Rottenberg, S., Wessels, L. F., Adams, D. J., Peeper, D. S., and Krijgsman, O. (2015). Copywriter: Dna copy number detection from off-target sequence data. *Genome Biol*, **16**, 49.
- Li, H. and Durbin, R. (2010). Fast and accurate long-read alignment with burrows-wheeler transform. *Bioinformatics*, **26**(5), 589–95.
- Li, H., Handsaker, B., Wysoker, A., Fennell, T., Ruan, J., Homer, N., Marth, G., Abecasis, G., Durbin, R., and 1000 Genome Project Data Processing Subgroup (2009). The sequence alignment/map format and samtools. *Bioinformatics*, **25**(16), 2078–9.
- Magi, A., Benelli, M., Marseglia, G., Nannetti, G., Scordo, M. R., and Torricelli, F. (2010). A shifting level model algorithm that identifies aberrations in array-cgh data. *Biostatistics*, **11**(2), 265–80.
- Magi, A., Tattini, L., Cifola, I., D'Aurizio, R., Benelli, M., Mangano, E., Battaglia, C., Bonora, E., Kurg, A., Seri, M., Magini, P., Giusti, B., Romeo, G., Pippucci, T., De Bellis, G., Abbate, R., and Gensini, G. F. (2013). Excavator: detecting copy number variants from whole-exome sequencing data. *Genome Biol*, **14**(10), R120.
- McCarroll, S. A., Kuruvilla, F. G., Korn, J. M., Cawley, S., Nemes, J., Wysoker, A., Shapero, M. H., de Bakker, P. I. W., Maller, J. B., Kirby, A., Elliott, A. L., Parkin, M., Hubbell, E., Webster, T., Mei, R., Veitch, J., Collins, P. J., Handsaker, R., Lincoln, S., Nizzari, M., Blume, J., Jones, K. W., Rava, R., Daly, M. J., Gabriel, S. B., and Altshuler, D. (2008). Integrated detection and population-genetic analysis of snps and copy number variation. *Nat Genet*, **40**(10), 1166–74.
- Yoon, S., Xuan, Z., Makarov, V., Ye, K., and Sebat, J. (2009). Sensitive and accurate detection of copy number variants using read depth of coverage. *Genome Res*, **19**(9), 1586–92.

| Sample ID | WES kit   | total reads | total reads<br>(no dup) | dup (%dup)       | Mapped<br>In Target (%) | Flanking (%)     | Off target (%)   |
|-----------|-----------|-------------|-------------------------|------------------|-------------------------|------------------|------------------|
| ERR039174 | NimGen SC | 88347712    | 66898351                | 21449361 (24.28) | 47478507 (70.97)        | 9252149 (13.83)  | 10167695 (15.20) |
| SRR309292 | NimGen SC | 184983780   | 165113236               | 19870544 (10.74) | 124714393 (75.53)       | 15880036 (9.62)  | 24518807 (14.85) |
| SC1       | NimGen SC | 52261424    | 47051646                | 5209778 (9.97)   | 18170372 (38.62)        | 2691579 (5.72)   | 26189695 (55.66) |
| SC2       | NimGen SC | 66880930    | 64410978                | 2469952 (3.69)   | 44665665 (69.34)        | 8628131 (13.40)  | 11117182 (17.26) |
| SC3       | NimGen SC | 64261764    | 61674574                | 2587190 (4.03)   | 43174166 (67.03)        | 7757938 (12.58)  | 10742470 (17.42) |
| SC4       | NimGen SC | 97504234    | 94011659                | 3492575 (3.58)   | 33713495 (54.66)        | 8901725 (9.47)   | 51396439 (54.67) |
| SC5       | NimGen SC | 54596812    | 52705854                | 3492575 (3.58)   | 33426555 (63.42)        | 7305126 (13.86)  | 11974173 (22.72) |
| SC6       | NimGen SC | 53105762    | 51332720                | 1773042 (3.34)   | 33352701 (64.97)        | 7191335 (14.01)  | 10788684 (21.02) |
| SC7       | NimGen SC | 52428800    | 50766702                | 1662098 (3.17)   | 33226087 (65.45)        | 7233795 (14.25)  | 10306820 (20.30) |
| SC8       | NimGen SC | 51585664    | 49573371                | 2012293 (3.9)    | 33015415 (66.60)        | 7556660 (15.24)  | 9001296 (18.16)  |
| SRR309293 | Illum TS  | 112885944   | 99846786                | 13039158 (11.55) | 48697849 (48.77)        | 7786469 (7.80)   | 43362468 (43.43) |
| TS1       | Illum TS  | 98066566    | 67599801                | 30466765 (31.07) | 41498127 (61.39)        | 10066857 (14.89) | 16034817 (23.72) |
| TS2       | Illum TS  | 149040972   | 107487177               | 41553795 (27.88) | 66251120 (61.64)        | 16472076 (15.32) | 24763981 (23.04) |
| TS3       | Illum TS  | 233371152   | 149634324               | 83736828 (35.88) | 89456899 (59.78)        | 24944108 (16.67) | 35233317 (23.55) |
| TS4       | Illum TS  | 204814304   | 135320695               | 69493609 (33.93) | 81506931 (60.23)        | 21977943 (16.24) | 31835821 (23.53) |
| TS5       | Illum TS  | 15204305    | 14713126                | 491179(3.23)     | 9073611 (61.67)         | 1572820 (10.69)  | 3718292 (25.27)  |
| TS6       | Illum TS  | 119472318   | 89972393                | 29499925 (24.69) | 53982638 (60.00)        | 13807865 (15.35) | 22181890 (24.65) |
| TS7       | Illum TS  | 144394810   | 109084718               | 35310092 (24.45) | 66439634 (60.91)        | 15164919 (13.90) | 27480165 (25.19) |
| TS8       | Illum TS  | 113879490   | 80482975                | 33396515 (29.33) | 50288688 (62.48)        | 10909671 (13.56) | 19284616 (23.96) |
| TS9       | Illum TS  | 109680894   | 81855834                | 27825060 (25.37) | 49949128 (61.02)        | 11145849 (13.62) | 20760857 (25.36) |
| SRR309291 | Agil SS   | 124112466   | 104169460               | 19943006 (16.07) | 73377796 (70.44)        | 8182048 (7.85)   | 22609616 (21.70) |
| SS1       | Agil SS   | 49506550    | 46343163                | 3163387 (6.39)   | 24407118 (52.67)        | 6716967 (14.49)  | 15219078 (32.84) |
| SS2       | Agil SS   | 62748490    | 55762934                | 6985556 (11.13)  | 33388926 (59.88)        | 7796468 (13.98)  | 14577540 (26.14) |
| SS3       | Agil SS   | 68381472    | 55404594                | 12976878 (18.98) | 34239385 (61.80)        | 8162598 (14.73)  | 13002611 (23.47) |
| SS4       | Agil SS   | 60646496    | 53777154                | 6869342 (11.33)  | 32663249 (60.74)        | 3698186 (6.88)   | 17415719 (32.38) |
| SS6       | Agil SS   | 65577064    | 57517689                | 8059375 (12.29)  | 35942669 (62.49)        | 8180373 (14.22)  | 13394647 (23.29) |
| SS7       | Agil SS   | 80597930    | 73125655                | 7472275 (9.27)   | 40299478 (55.11)        | 10399825 (14.22) | 22426352 (30.67) |
| SS8       | Agil SS   | 84954462    | 77293918                | 7660544 (9.02)   | 41725253 (53.98)        | 11857340 (15.34) | 23711325 (30.68) |
| SS10      | Agil SS   | 68112888    | 53492078                | 14620810 (21.47) | 31496528 (58.88)        | 6723084 (12.57)  | 15272466 (28.55) |
| SS11      | Agil SS   | 88791162    | 78225154                | 10566008 (11.9)  | 38577180 (49.32)        | 11857177 (15.16) | 27790797 (35.53) |

Supplemental Table 1: Detailed statistics about the samples used for the WES Survey Data set. Exomes produced using NimbleGen kits have on average 71.5 million reads ranging from 5.1 to 18.5 millions reads, TruSeq exomes are of 142 millions reads on average varying from 98 to 233 millions and SureSelect ones range from 49 to 124 millions reads, 71 millions on average. NimGen SeqCap replaces NimbleGen SeqCap EZ Exome v2.0 44Mb, Illum TS replaces Illumina TruSeq Exome Enrichment 62Mb and Agil SS replaces Agilent SureSelect Human All Exon 50Mb.

| Sample  | Population | Conrad et al. |     |                 |                 | McCarroll et al. |       |                 |                 |
|---------|------------|---------------|-----|-----------------|-----------------|------------------|-------|-----------------|-----------------|
|         |            | DUP           | DEL | mean length DUP | mean length DEL | DUP              | DEL   | mean length DUP | mean length DEL |
| NA19131 | YRI        | 365           | 438 | 9334            | 9082            | 120              | 121   | 52652           | 31830           |
| NA19138 | YRI        | 347           | 476 | 9262            | 13013           | 112              | 110   | 49533           | 40549           |
| NA19152 | YRI        | 357           | 405 | 9378            | 8182            | 110              | 124   | 53074           | 33511           |
| NA19159 | YRI        | 351           | 405 | 8961            | 9092            | 118              | 130   | 46345           | 34391           |
| NA19200 | YRI        | 344           | 468 | 9954            | 11348           | 111              | 128   | 47474           | 32185           |
| NA19206 | YRI        | 371           | 405 | 9167            | 8596            | 107              | 126   | 48527           | 34878           |
| NA19223 | YRI        | 359           | 490 | 9582            | 10304           | 107              | 128   | 47702           | 27347           |
| NA10847 | CEU        | -             | -   | -               | -               | -                | -     | -               | -               |
| Mean    |            | 356.2         | 441 | 9376.8          | 9945.2          | 112.1            | 123.8 | 49329.5         | 33527.2         |

Supplemental Table 2: Samples from 1000 Genomes Project with Conrad's and McCarroll's CNV characterisation. NA10847 was used as control.

| Sample  | Population | Project Center | Platform | Tot Exome Seq | % Targets $\geq$ 20x |
|---------|------------|----------------|----------|---------------|----------------------|
| NA06985 | CEU        | BCM            | ILLUMINA | 6027283676    | 90                   |
| NA06986 | CEU        | BI             | ILLUMINA | 24104123900   | 93                   |
| NA07000 | CEU        | BCM            | ILLUMINA | 6452445499    | 91                   |
| NA07048 | CEU        | BI             | ILLUMINA | 16685037188   | 92                   |
| NA07051 | CEU        | BI             | ILLUMINA | 14837397464   | 86                   |
| NA07347 | CEU        | BI             | ILLUMINA | 18370193548   | 88                   |
| NA07357 | CEU        | BCM            | ILLUMINA | 5529433769    | 89                   |
| NA10851 | CEU        | BCM            | ILLUMINA | 6819007021    | 93                   |
| NA11829 | CEU        | BCM            | ILLUMINA | 6612402027    | 92                   |
| NA11830 | CEU        | BCM            | ILLUMINA | 6749788186    | 93                   |
| NA11831 | CEU        | BCM            | ILLUMINA | 5723298522    | 89                   |
| NA11832 | CEU        | BCM            | ILLUMINA | 6894731266    | 92                   |
| NA11881 | CEU        | BCM            | ILLUMINA | 7996466435    | 94                   |
| NA11918 | CEU        | BI             | ILLUMINA | 23573702952   | 92                   |
| NA11919 | CEU        | BI             | ILLUMINA | 18583826356   | 83                   |
| NA11920 | CEU        | BI             | ILLUMINA | 16208787444   | 94                   |
| NA11992 | CEU        | BCM            | ILLUMINA | 6222852602    | 90                   |
| NA11993 | CEU        | BCM            | ILLUMINA | 6757616191    | NA                   |
| NA11994 | CEU        | BCM            | ILLUMINA | 7010501910    | 92                   |
| NA11995 | CEU        | BCM            | ILLUMINA | 3843488239    | 84                   |
| NA12003 | CEU        | BCM            | ILLUMINA | 3944293208    | 84                   |
| NA12005 | CEU        | BCM            | ILLUMINA | 6636259439    | 91                   |
| NA12043 | CEU        | BCM            | ILLUMINA | 8878610737    | 93                   |
| NA12044 | CEU        | BCM            | ILLUMINA | 6857270164    | 93                   |
| NA12045 | CEU        | BI             | ILLUMINA | 15487027832   | 86                   |
| NA12144 | CEU        | BCM            | ILLUMINA | 6587073651    | 93                   |
| NA12154 | CEU        | BCM            | ILLUMINA | 6494580477    | 92                   |
| NA12156 | CEU        | BCM            | ILLUMINA | 4215485884    | 82                   |
| NA12234 | CEU        | BCM            | ILLUMINA | 6852784956    | 87                   |
| NA12489 | CEU        | BCM            | ILLUMINA | 6330614047    | 91                   |
| NA12762 | CEU        | BCM            | ILLUMINA | 5128453366    | 88                   |
| NA12812 | CEU        | BCM            | ILLUMINA | 6615884406    | 89                   |
| NA12813 | CEU        | BCM            | ILLUMINA | 9309388564    | 92                   |
| NA12815 | CEU        | BCM            | ILLUMINA | 5770682066    | 89                   |
| NA12872 | CEU        | BCM            | ILLUMINA | 5433437511    | 88                   |
| NA12873 | CEU        | BCM            | ILLUMINA | 6420725136    | 90                   |
| NA12878 | CEU        | BI             | ILLUMINA | 17082242372   | 89                   |
| NA18486 | YRI        | BI             | ILLUMINA | 17668337348   | 94                   |
| NA18489 | YRI        | BI             | ILLUMINA | 14711774252   | 87                   |
| NA18498 | YRI        | BI             | ILLUMINA | 6882363008    | 73                   |
| NA18499 | YRI        | BI             | ILLUMINA | 13181571784   | 93                   |
| NA18501 | YRI        | BI             | ILLUMINA | 13369756144   | 93                   |
| NA18502 | YRI        | BCM            | ILLUMINA | 7423286890    | 89                   |
| NA18504 | YRI        | BI             | ILLUMINA | 16864396732   | 88                   |
| NA18505 | YRI        | BCM            | ILLUMINA | 9692055445    | 92                   |
| NA18507 | YRI        | BCM            | ILLUMINA | 5139715977    | 84                   |
| NA18508 | YRI        | BCM            | ILLUMINA | 10881456291   | 92                   |
| NA18510 | YRI        | BI             | ILLUMINA | 17725889472   | 90                   |
| NA18516 | YRI        | BI             | ILLUMINA | 12915915760   | 93                   |
| NA18519 | YRI        | BI             | ILLUMINA | 9932791964    | 83                   |
| NA18520 | YRI        | BI             | ILLUMINA | 11531938204   | 91                   |
| NA18522 | YRI        | BI             | ILLUMINA | 23265974468   | 93                   |
| NA18631 | CHB        | BI             | ILLUMINA | 17008911204   | 88                   |
| NA18634 | CHB        | BI             | ILLUMINA | 17716920986   | 88                   |
| NA18639 | CHB        | BCM            | ILLUMINA | 6607324757    | 89                   |
| NA18640 | CHB        | BCM            | ILLUMINA | 5932760503    | 91                   |

Supplemental Table 3: Samples from 1000 Genomes Project...to be continued

| Sample  | Population | Project Center | Platform | Tot Exome Seq | % Targets $\geq$ 20x |
|---------|------------|----------------|----------|---------------|----------------------|
| NA18641 | CHB        | BCM            | ILLUMINA | 8638346685    | 92                   |
| NA18642 | CHB        | BCM            | ILLUMINA | 7414985801    | 90                   |
| NA18643 | CHB        | BCM            | ILLUMINA | 6767105545    | 91                   |
| NA18645 | CHB        | BCM            | ILLUMINA | 4918028451    | 86                   |
| NA18740 | CHB        | BCM            | ILLUMINA | 6884548042    | 91                   |
| NA18745 | CHB        | BCM            | ILLUMINA | 6026798775    | 90                   |
| NA18747 | CHB        | BCM            | ILLUMINA | 8257959677    | 93                   |
| NA18748 | CHB        | BCM            | ILLUMINA | 7223470308    | 90                   |
| NA18749 | CHB        | BCM            | ILLUMINA | 8422599171    | 92                   |
| NA18757 | CHB        | BCM            | ILLUMINA | 6337149858    | 90                   |
| NA18853 | YRI        | BI             | ILLUMINA | 16464420436   | 94                   |
| NA18856 | YRI        | BI             | ILLUMINA | 16425604272   | 87                   |
| NA18867 | YRI        | BI             | ILLUMINA | 21646713376   | 95                   |
| NA18868 | YRI        | BI             | ILLUMINA | 15737628332   | 90                   |
| NA18870 | YRI        | BI             | ILLUMINA | 13840647584   | 93                   |
| NA18871 | YRI        | BI             | ILLUMINA | 15020932828   | 87                   |
| NA18873 | YRI        | BI             | ILLUMINA | 23834535408   | 92                   |
| NA18874 | YRI        | BI             | ILLUMINA | 9492274604    | 83                   |
| NA18910 | YRI        | BI             | ILLUMINA | 14325967928   | 92                   |
| NA18912 | YRI        | BI             | ILLUMINA | 25547455784   | 93                   |
| NA18953 | JPT        | BI             | ILLUMINA | 20537617560   | 94                   |
| NA18956 | JPT        | BCM            | ILLUMINA | 9098365123    | 89                   |
| NA18959 | JPT        | BI             | ILLUMINA | 16045090892   | 93                   |
| NA18960 | JPT        | BI             | ILLUMINA | 19403095412   | 94                   |
| NA18961 | JPT        | BI             | ILLUMINA | 11694842684   | 92                   |
| NA18964 | JPT        | BI             | ILLUMINA | 18804225520   | 94                   |
| NA18965 | JPT        | BCM            | ILLUMINA | 6887697424    | 83                   |
| NA18978 | JPT        | BCM            | ILLUMINA | 7178040710    | 90                   |
| NA18980 | JPT        | BCM            | ILLUMINA | 10486917264   | 92                   |
| NA18997 | JPT        | BCM            | ILLUMINA | 6521651305    | 90                   |
| NA18998 | JPT        | BCM            | ILLUMINA | 8059427411    | 89                   |
| NA18999 | JPT        | BI             | ILLUMINA | 23249343692   | 93                   |
| NA19000 | JPT        | BI             | ILLUMINA | 17575878636   | 93                   |
| NA19003 | JPT        | BI             | ILLUMINA | 11462473596   | 92                   |
| NA19005 | JPT        | BCM            | ILLUMINA | 6193270611    | 89                   |
| NA19007 | JPT        | BI             | ILLUMINA | 16983811428   | 93                   |
| NA19012 | JPT        | BI             | ILLUMINA | 23514324076   | 93                   |
| NA19092 | YRI        | BI             | ILLUMINA | 10096466924   | 92                   |
| NA19093 | YRI        | BI             | ILLUMINA | 13066696796   | 93                   |
| NA19099 | YRI        | BCM            | ILLUMINA | 9409623085    | 92                   |
| NA19102 | YRI        | BI             | ILLUMINA | 14024421816   | 93                   |
| NA19116 | YRI        | BI             | ILLUMINA | 15582041360   | 92                   |
| NA19130 | YRI        | BI             | ILLUMINA | 23860580152   | 93                   |
| NA19172 | YRI        | BI             | ILLUMINA | 24450358924   | 92                   |

Supplemental Table 3: ...Samples from 1000 Genomes Project

| Run ID    | Tissue Type | Target | Sample Name |
|-----------|-------------|--------|-------------|
| SRR986735 | Blood       | v3     | 251-C       |
| SRR986736 | Bladder     | v3     | 251-T       |
| SRR986737 | Blood       | v3     | 114-C       |
| SRR986738 | Bladder     | v3     | 114-T       |
| SRR986739 | Blood       | v3     | 310-C       |
| SRR986740 | Bladder     | v3     | 310-T       |
| SRR986741 | Blood       | v3     | 116-C       |
| SRR986742 | Bladder     | v3     | 116-T       |
| SRR986743 | Bladder     | v3     | 331-C       |
| SRR986744 | Blood       | v3     | 331-T       |
| SRR986745 | Blood       | v3     | 413-C       |
| SRR986746 | Bladder     | v3     | 413-T       |
| SRR986751 | Blood       | v4     | 64-C        |
| SRR986752 | Bladder     | v4     | 64-T        |
| SRR986753 | Blood       | v4     | 179-C       |
| SRR986754 | Bladder     | v4     | 179-T       |
| SRR986755 | Blood       | v4     | 62-C        |
| SRR986759 | Bladder     | v4     | 62-T        |
| SRR986756 | Blood       | v4     | 188-C       |
| SRR986760 | Bladder     | v4     | 188-T       |
| SRR986757 | Blood       | v4     | 313-C       |
| SRR986761 | Bladder     | v4     | 313-T       |
| SRR986758 | Blood       | v4     | 343-C       |
| SRR986762 | Bladder     | v4     | 343-T       |
| SRR986763 | Blood       | v4     | 274-C       |
| SRR986764 | Bladder     | v4     | 274-T       |
| SRR986765 | Blood       | v4     | 451-C       |
| SRR986766 | Bladder     | v4     | 451-T       |

Supplemental Table 4: Bladder Samples



Supplemental Figure 1: Distribution of mapped reads for the 30 WES samples, split per enrichment kit : (a) Illumina TruSeq Exome Enrichment 62Mb (b) Agilent SureSelect Human All Exon 50Mb (c) NimbleGen SeqCap EZ Exome v2.0 44Mb. The absolute number (left) and relative number (right) of mapped reads to In-Target, Flanking and Off-Target regions are shown.

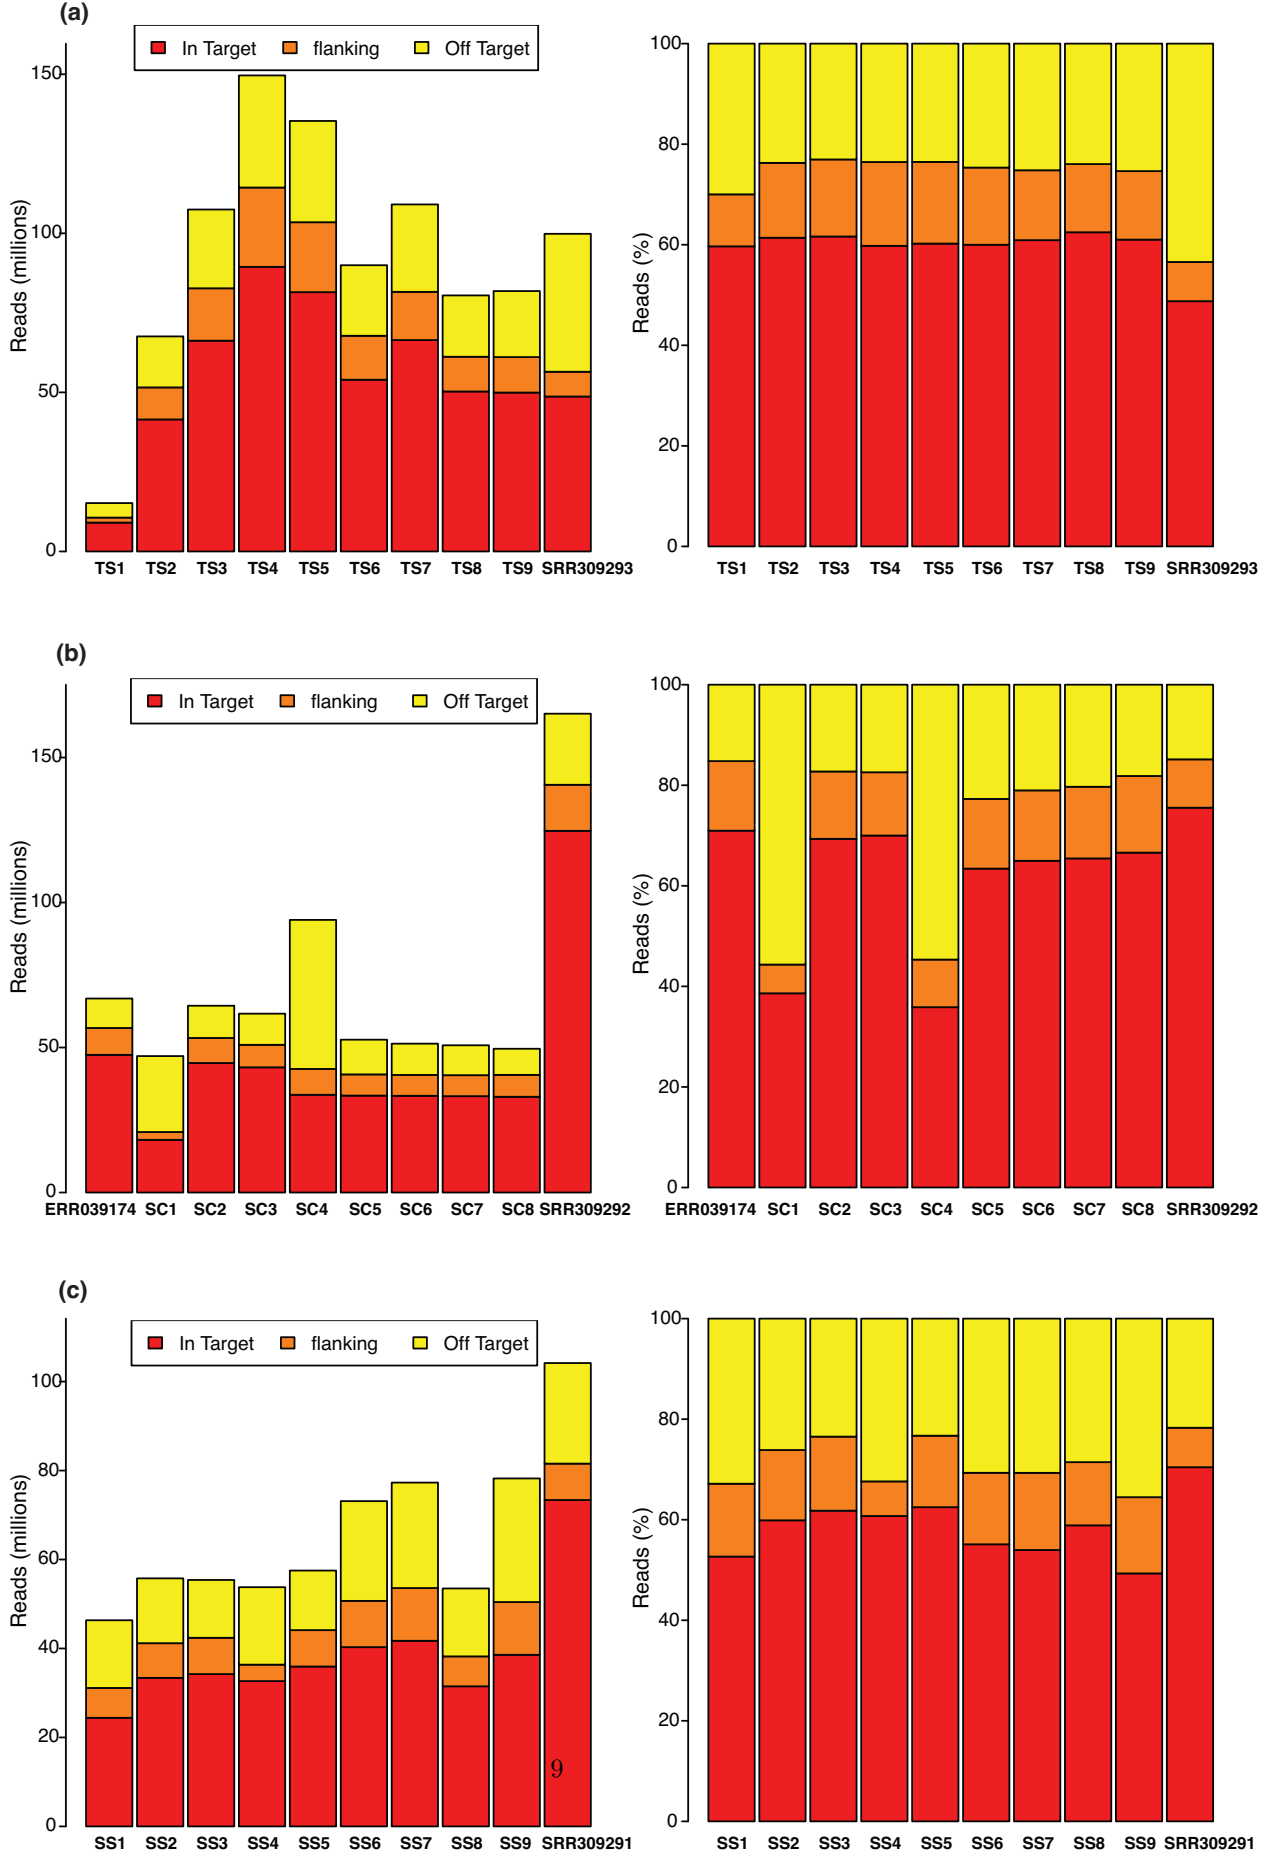

Supplemental Figure 2: Biases correction of WMRC for In-target regions. (a-b) pre and after exon-length normalisation, (c-d) pre and after mappability normalisation and (e-f) pre and after normalisation per local GC content

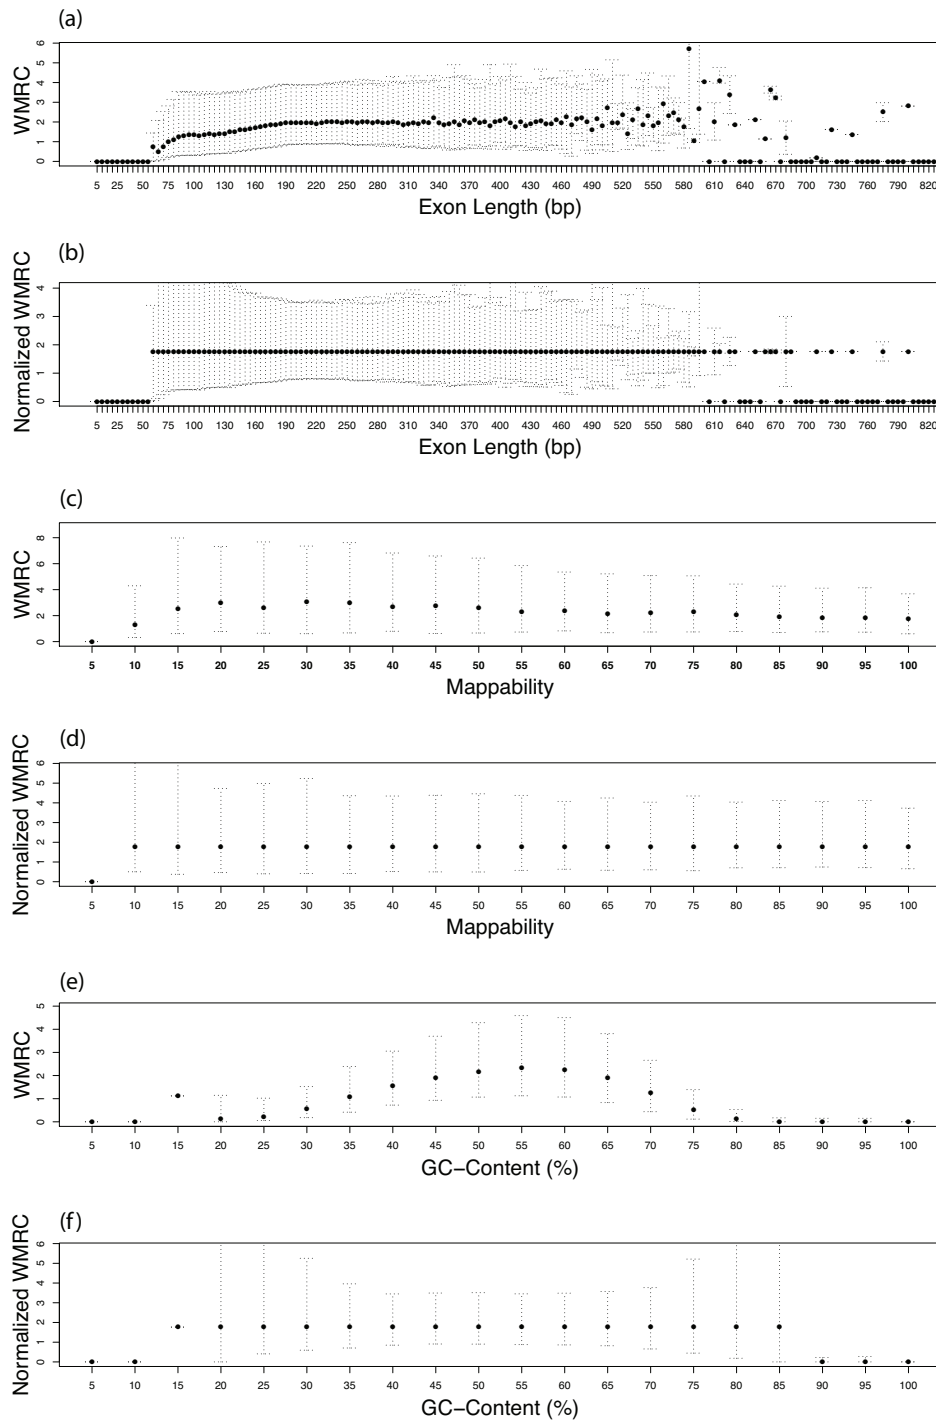

Supplemental Figure 3: Copy number correlation with Conrad calls. Boxplots summarize the capability of WMRC data to predict the exact number of DNA copies of a CNV region. Normalized WMRC ratio were calculated for eight samples using NA10847 as control and compared with copy number ratios from Conrad characterisation. R is the Pearson correlation coefficient. (a) all genomic regions, (b) In-Target regions and (c) Off-Target regions

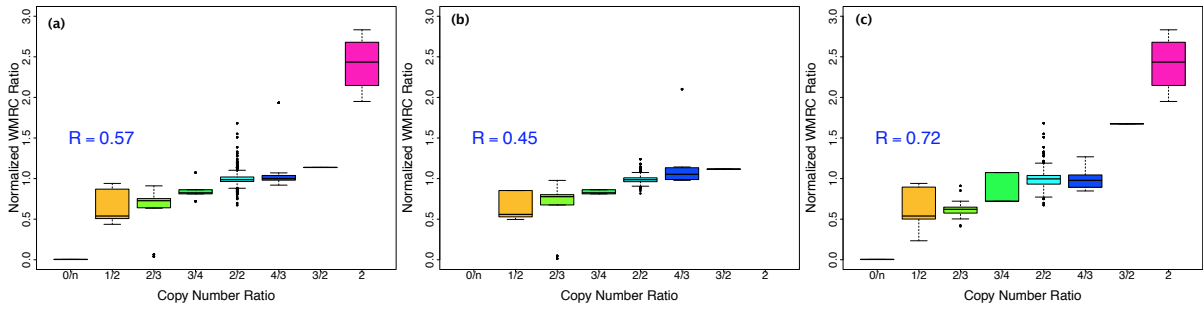

Supplemental Figure 4: Deletions in bladder samples. The profiles of two regions containing potential deletions in Chr 3 and 6 of patient 64 are shown from SNParray (a,d), EXCAVATOR2 (b,e) and CopywriteR (c,f)

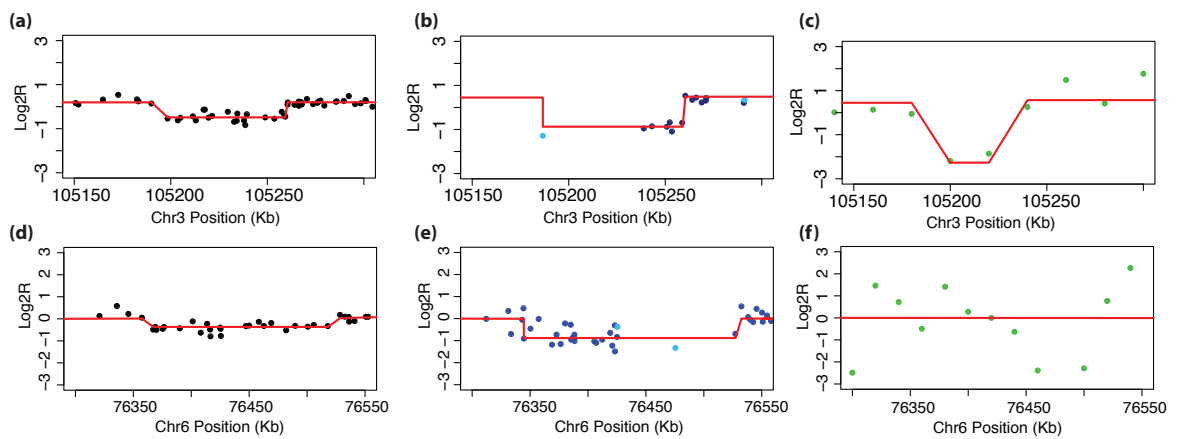

Supplement: supp_gkw695_EXCAVATOR2_Supplemental.pdf [file supp_gkw695_EXCAVATOR2_Supplemental.pdf]
